# Supplementary material
Source: MDPI journal article supplement (https://www.mdpi.com/2071-1050/11/8/2242)
Supplement: s1 [file s1]

## Supplementary

### JPI URBAN EUROPE PROJECTS CATALOGUE 2017

Call Details, Excerpt from pp. 14-15

<https://jpi-urbaneurope.eu/app/uploads/2017/06/JPI-UE-Projects-Catalogue-2017-2.0-170608.pdf>  
(accessed on 07.03.2019).

#### *The First JPI Urban Europe Pilot Call*

The first JPI Urban Europe Pilot Call opened in June 2012 with a deadline for proposals two months later in September. The call was a one-phase call only. This call addressed three broader topics: Urban Diversity and Social Cohesion; Urban Systems and Networks; Governance of Complex Urban Systems.

#### *The Second JPI Urban Europe Pilot Call*

The second pilot call was a two-stage call. The call opened in June 2013, with a deadline for pre-proposals in September and a deadline for full proposals in January 2014. The second pilot call addressed two equally broad topics: Governance of Urban Complexity; Urban Vulnerability, Adaptability, and Resilience.

#### *ERA-NET Cofund Smart Cities and Communities (ENSCC)*

The third call, ERA-NET Cofund Smart Cities and Communities (ENSCC), took place through a joint effort with the Smart Cities Member States Initiative supported by the European Commission under the Horizon 2020 programme. It was a two-stage call that opened in December 2014 with a deadline for pre-proposals in March 2015 and deadline for full proposals in September 2015. The call was pre-announced through several channels as early as September 2014 in order to allow more time to approach relevant consortia.

The call focused on innovation and implementation of integrated low-carbon energy and transport systems on an urban scale, with a mandatory demand to include innovation and implementation activities, which entailed higher entry barriers for potential project partners compared to the previous pilot calls. The call topics were: Smart Integrated Urban Energy and Transport Systems; Smart Tools and Services for Integrated Urban Energy and Transport Systems; Smart Data, Big Data; Smart Governance and Smart Citizens.

#### *ERA-NET Cofund Smart Urban Futures (ENSUF)*

The fourth call, ERA-NET Cofund Smart Urban Futures (ENSUF), was also a two-phase call supported by the European Commission. It opened in December 2015 with a deadline for pre-proposals in March 2016 and deadline for full proposals in September 2016. The call focused on three topics: Concepts and Strategies for Smart Urban Transformation, Growth and Shrinkage; New Dynamics of Public Services; Inclusive, Vibrant and Accessible Urban Communities.

#### *Sustainable Urbanisation Global Initiative (SUGI)/Food-Water-Energy Nexus*

The Sustainable Urbanisation Global Initiative (SUGI)/Food-Water-Energy Nexus call was jointly established by the Belmont Forum and JPI Urban Europe. The purpose of the collaboration was to bring together the fragmented research and expertise from around the globe in order to devise innovative new solutions to the Food-Water-Energy Nexus challenge. The call is a two-phase call supported by the European Commission, which opened in December 2016 and focused on three topics: Robust Knowledge, Indicators and Assessments; Managing Strategies and Solutions; Multi-level Governance and Management.
